# Supplementary material for: Calcium isotope fractionation between aqueous compounds relevant to low-temperature geochemistry, biology and medicine
Source: PubMed Central journal article supplement (PMC5343585; doi:10.1038/srep44255), 2017-03-09
Supplement: srep44255-s1.pdf [file srep44255-s1.pdf]

## Supporting Information

### Calcium isotope fractionation between aqueous compounds relevant to low-temperature geochemistry, biology and medicine

Frédéric Moynier<sup>1,2</sup> and Toshiyuki Fujii<sup>3</sup>

<sup>1</sup> Institut de Physique du Globe de Paris, Sorbonne Paris Cité, Université Paris Diderot, CNRS, F-75005 Paris, France

<sup>2</sup> Institut Universitaire de France, Paris, France

Table S1 Optimized structure Cartesian coordinates of Ca(II) complexes.

| Ca(H <sub>2</sub> O) <sub>6</sub> <sup>2+</sup> |           |           |           |
|-------------------------------------------------|-----------|-----------|-----------|
| Ca                                              | 0.000029  | 0.000003  | -0.000042 |
| O                                               | 2.404773  | 0.002355  | 0.000089  |
| O                                               | -2.404752 | 0.001453  | 0.001441  |
| O                                               | -0.000767 | 2.404899  | -0.000034 |
| O                                               | 0.003007  | -2.404628 | -0.000097 |
| O                                               | -0.000009 | -0.000645 | 2.404701  |
| O                                               | 0.000147  | -0.000553 | -2.404827 |
| H                                               | 2.991570  | 0.771484  | 0.000250  |
| H                                               | 2.990815  | -0.767371 | 0.000133  |
| H                                               | -2.990057 | 0.771733  | 0.000951  |
| H                                               | -2.992325 | -0.767096 | 0.001025  |
| H                                               | -0.000563 | 2.991297  | 0.769410  |
| H                                               | 0.000012  | 2.991366  | -0.769424 |
| H                                               | 0.002016  | -2.991022 | 0.769353  |
| H                                               | 0.002305  | -2.991086 | -0.769498 |
| H                                               | 0.769340  | 0.000422  | 2.991223  |
| H                                               | -0.769511 | -0.001419 | 2.991022  |
| H                                               | 0.769720  | 0.000306  | -2.991059 |
| H                                               | -0.769112 | -0.001110 | -2.991469 |

| Ca(H <sub>2</sub> O) <sub>7</sub> <sup>2+</sup> |           |           |           |
|-------------------------------------------------|-----------|-----------|-----------|
| Ca                                              | 0.649895  | 0.045514  | -0.229078 |
| O                                               | 0.608890  | 0.310855  | 2.242967  |
| O                                               | 2.927916  | -0.477241 | 0.547770  |
| O                                               | 1.457880  | -1.831082 | -1.604427 |
| O                                               | 1.788190  | 2.149608  | -0.598909 |
| O                                               | -1.008080 | -1.654947 | 0.239641  |
| O                                               | -0.199569 | 0.465579  | -2.528027 |
| O                                               | -1.262551 | 1.531461  | 0.142468  |
| H                                               | 1.398620  | 3.025654  | -0.717833 |

|   |           |           |           |
|---|-----------|-----------|-----------|
| H | 2.743656  | 2.288593  | -0.561680 |
| H | 0.266120  | -0.343236 | 2.866846  |
| H | 0.896074  | 1.058327  | 2.784293  |
| H | -1.894710 | -1.538831 | 0.605371  |
| H | -0.939848 | -2.589688 | 0.004593  |
| H | -0.973870 | 0.094587  | -2.971912 |
| H | 0.195294  | 1.076332  | -3.164905 |
| H | 3.180543  | -0.454818 | 1.479840  |
| H | 3.713586  | -0.770767 | 0.068683  |
| H | 2.021158  | -2.585001 | -1.386971 |
| H | 1.270745  | -1.905583 | -2.549146 |
| H | -1.584118 | 1.865449  | 0.989692  |
| H | -1.848986 | 1.904189  | -0.528287 |

Ca(H<sub>2</sub>O)<sub>8</sub><sup>2+</sup>

|    |           |           |           |
|----|-----------|-----------|-----------|
| Ca | 0.000214  | 0.000126  | -0.000080 |
| O  | 0.002844  | 0.111151  | 2.495376  |
| O  | 2.376472  | 0.062501  | 0.769891  |
| O  | 1.133055  | -1.080741 | -1.946542 |
| O  | 0.352223  | -2.410715 | 0.553609  |
| O  | 1.099253  | 1.989249  | -1.038251 |
| O  | -1.453787 | 0.309492  | -2.007668 |
| O  | -2.228776 | -1.015146 | 0.493281  |
| O  | -1.280075 | 2.034756  | 0.681198  |
| H  | -0.680932 | -0.104611 | 3.141659  |
| H  | 0.805024  | 0.290412  | 3.001931  |
| H  | 0.642320  | -3.054889 | -0.104527 |
| H  | 0.359353  | -2.871080 | 1.402029  |
| H  | -2.308864 | -0.130312 | -2.095238 |
| H  | -1.384643 | 0.914910  | -2.756323 |
| H  | 0.862133  | 2.893386  | -0.796465 |
| H  | 1.704735  | 2.060902  | -1.786626 |
| H  | -1.290654 | 2.360213  | 1.590106  |
| H  | -1.919713 | 2.570782  | 0.196028  |
| H  | 2.938581  | -0.623988 | 1.150141  |
| H  | 2.950685  | 0.821708  | 0.608227  |
| H  | 0.691375  | -1.211846 | -2.795018 |
| H  | 2.054115  | -1.336808 | -2.080295 |
| H  | -3.071045 | -0.609822 | 0.734292  |
| H  | -2.350372 | -1.967870 | 0.592245  |

CaF(H<sub>2</sub>O)<sub>5</sub><sup>+</sup>

|    |           |           |           |
|----|-----------|-----------|-----------|
| Ca | -0.365314 | -0.002777 | 0.001721  |
| F  | 1.761130  | -0.000696 | 0.000028  |
| O  | -0.726515 | -1.796795 | 1.588379  |
| O  | 0.558159  | 1.954699  | 1.076480  |
| O  | -0.722998 | 1.795047  | -1.582844 |

|   |           |           |           |
|---|-----------|-----------|-----------|
| O | 0.558409  | -1.957040 | -1.075983 |
| O | -2.793341 | 0.003305  | -0.006336 |
| H | -0.239447 | 2.571400  | -1.268238 |
| H | -0.805229 | 1.888131  | -2.538913 |
| H | -0.819848 | -1.888273 | 2.543561  |
| H | -0.242892 | -2.575609 | 1.280241  |
| H | 1.439291  | -1.551192 | -0.914232 |
| H | 0.623012  | -2.583180 | -1.803718 |
| H | -3.375826 | -0.652813 | 0.394786  |
| H | -3.363786 | 0.666028  | -0.413893 |
| H | 1.438608  | 1.548368  | 0.912854  |
| H | 0.624153  | 2.578652  | 1.805983  |

CaF<sub>2</sub>(H<sub>2</sub>O)<sub>4</sub>

|    |           |           |           |
|----|-----------|-----------|-----------|
| Ca | -0.000588 | -0.005652 | -0.015192 |
| F  | 2.221888  | -0.017629 | 0.007479  |
| F  | -2.222385 | 0.029322  | 0.006380  |
| O  | 1.013425  | 1.705117  | 1.381505  |
| O  | 1.023012  | -1.720545 | -1.393029 |
| O  | -1.024204 | -1.382063 | 1.703240  |
| O  | -1.013959 | 1.404427  | -1.714481 |
| H  | 1.863644  | -1.298238 | -1.094128 |
| H  | 1.120486  | -2.026696 | -2.297355 |
| H  | -1.118841 | -2.291183 | 1.995732  |
| H  | -1.865769 | -1.080233 | 1.285819  |
| H  | -1.080014 | 2.322783  | -1.985960 |
| H  | -1.854292 | 1.130250  | -1.275692 |
| H  | 1.083148  | 1.980027  | 2.298629  |
| H  | 1.854995  | 1.271279  | 1.104190  |

CaCl(H<sub>2</sub>O)<sub>5</sub><sup>+</sup>

|    |           |           |           |
|----|-----------|-----------|-----------|
| Ca | -0.347815 | 0.022664  | -0.140446 |
| Cl | 2.211553  | 0.358962  | -0.480072 |
| O  | -0.597711 | -1.425463 | 1.787041  |
| O  | 0.306993  | 1.384223  | 1.767740  |
| O  | -0.304321 | 1.733820  | -1.807719 |
| O  | 0.200128  | -1.853785 | -1.511507 |
| O  | -2.766661 | -0.063525 | -0.010843 |
| H  | -0.769415 | 2.342265  | -2.391616 |
| H  | 0.649750  | 1.851737  | -1.951730 |
| H  | -0.229094 | -1.032369 | 2.589395  |
| H  | -0.469317 | -2.378554 | 1.864068  |
| H  | 1.156098  | -1.763016 | -1.657557 |
| H  | -0.120519 | -2.566501 | -2.074564 |
| H  | -3.191479 | -0.541010 | 0.712890  |
| H  | -3.478954 | 0.299587  | -0.550659 |
| H  | 1.252500  | 1.484417  | 1.554806  |

|   |          |          |          |
|---|----------|----------|----------|
| H | 0.045827 | 2.143809 | 2.300648 |
|---|----------|----------|----------|

CaCl<sub>2</sub>(H<sub>2</sub>O)<sub>4</sub>

|    |           |           |           |
|----|-----------|-----------|-----------|
| Ca | 0.000099  | 0.005006  | 0.002434  |
| Cl | 2.688271  | -0.004834 | 0.003557  |
| Cl | -2.688320 | 0.019080  | -0.005349 |
| O  | 0.684653  | 1.775524  | 1.495140  |
| O  | 0.675096  | -1.781008 | -1.478608 |
| O  | -0.692890 | -1.490915 | 1.768568  |
| O  | -0.667128 | 1.496578  | -1.776189 |
| H  | 1.637902  | -1.639090 | -1.450988 |
| H  | 0.435797  | -2.113899 | -2.348413 |
| H  | -0.458521 | -2.367465 | 2.086993  |
| H  | -1.654601 | -1.457941 | 1.620534  |
| H  | -0.420960 | 2.364497  | -2.108931 |
| H  | -1.630174 | 1.475736  | -1.635143 |
| H  | 0.444429  | 2.109918  | 2.364097  |
| H  | 1.646890  | 1.629779  | 1.469436  |

CaSO<sub>4</sub>(H<sub>2</sub>O)<sub>5</sub>

|    |           |           |           |
|----|-----------|-----------|-----------|
| Ca | 0.178189  | 0.221523  | -0.340353 |
| S  | 0.337829  | -3.157730 | -0.378009 |
| O  | -0.396678 | 0.649855  | 2.144098  |
| O  | 2.578184  | 0.137288  | 0.114872  |
| O  | -0.045686 | -0.440304 | -2.365163 |
| O  | -0.360235 | 2.538089  | 0.172135  |
| O  | 0.941503  | -1.879513 | 0.223778  |
| O  | -1.115683 | -3.163788 | -0.016478 |
| O  | 0.451872  | -2.937357 | -1.953315 |
| O  | 1.072993  | -4.360280 | -0.049255 |
| O  | -1.952695 | -0.784426 | 0.488714  |
| H  | -1.152932 | 0.043268  | 2.021655  |
| H  | 0.137397  | 0.293782  | 2.862275  |
| H  | 0.221494  | -1.955540 | -2.200598 |
| H  | -0.270493 | -0.273090 | -3.280749 |
| H  | -1.722255 | -1.764560 | 0.331818  |
| H  | -2.834224 | -0.657084 | 0.124510  |
| H  | 2.495692  | -0.838382 | 0.168440  |
| H  | 3.402893  | 0.339038  | -0.335598 |
| H  | -0.508811 | 3.428120  | -0.158752 |
| H  | -0.499655 | 2.534008  | 1.130573  |

CaHS(H<sub>2</sub>O)<sub>5</sub><sup>+</sup>

|    |           |           |           |
|----|-----------|-----------|-----------|
| Ca | -0.355314 | -0.030718 | 0.077024  |
| S  | 2.385303  | -0.204728 | -0.160047 |
| O  | -0.443671 | 1.833113  | -1.488807 |
| O  | 0.036590  | -1.600792 | -1.655127 |

|   |           |           |           |
|---|-----------|-----------|-----------|
| O | -0.908808 | -1.808060 | 1.625728  |
| O | 0.520237  | 1.540185  | 1.624744  |
| O | -2.736599 | 0.425042  | 0.032939  |
| H | -0.797410 | -2.736476 | 1.384729  |
| H | -0.876798 | -1.778108 | 2.589839  |
| H | -0.319019 | 1.749595  | -2.442429 |
| H | -0.011357 | 2.659893  | -1.238917 |
| H | 1.457236  | 1.314444  | 1.414773  |
| H | 0.496254  | 2.186941  | 2.337980  |
| H | -3.113563 | 1.163783  | -0.460677 |
| H | -3.475945 | -0.034455 | 0.448454  |
| H | 1.017423  | -1.519866 | -1.586055 |
| H | -0.188007 | -2.172240 | -2.397144 |
| H | 2.719772  | -1.172609 | 0.717845  |

Ca(HS)<sub>2</sub>(H<sub>2</sub>O)<sub>4</sub>

|    |           |           |           |
|----|-----------|-----------|-----------|
| Ca | 0.000665  | -0.000953 | -0.000963 |
| S  | 2.304943  | 0.252252  | 1.615778  |
| S  | -2.307342 | -0.248258 | -1.613567 |
| O  | -1.201511 | -1.994045 | 0.687525  |
| O  | -1.705901 | 1.527957  | 0.808873  |
| O  | 1.709794  | -1.530802 | -0.804445 |
| O  | 1.201051  | 1.991528  | -0.692174 |
| H  | 2.332138  | -1.368780 | -0.062689 |
| H  | 2.211938  | -1.791511 | -1.581958 |
| H  | -1.774899 | -2.061298 | -0.101438 |
| H  | -0.904529 | -2.878929 | 0.920521  |
| H  | -2.203623 | 1.789524  | 1.588947  |
| H  | -2.331754 | 1.369621  | 0.069439  |
| H  | -1.942983 | -0.041160 | -2.892246 |
| H  | 0.906177  | 2.875369  | -0.931601 |
| H  | 1.772376  | 2.062589  | 0.097870  |
| H  | 1.933135  | 0.046604  | 2.892577  |

CaOH(H<sub>2</sub>O)<sub>5</sub><sup>+</sup>

|    |           |           |           |
|----|-----------|-----------|-----------|
| Ca | -0.157361 | -0.167169 | 0.031576  |
| O  | -1.480015 | 1.743487  | -0.609021 |
| O  | -1.313507 | -1.808655 | -1.292283 |
| O  | 1.642390  | -0.207910 | -1.210228 |
| O  | 1.140092  | 1.950856  | 0.079941  |
| O  | -1.568601 | -0.206607 | 2.009392  |
| O  | 1.523115  | -1.506210 | 1.033023  |
| H  | 1.684506  | 1.373515  | -0.533006 |
| H  | 1.732934  | 2.476239  | 0.626333  |
| H  | -2.196687 | 2.032454  | -1.183422 |
| H  | -0.796976 | 2.434378  | -0.606815 |
| H  | -0.814652 | -2.188232 | -2.026868 |

|   |           |           |           |
|---|-----------|-----------|-----------|
| H | -2.148470 | -2.288432 | -1.249628 |
| H | -2.230908 | 0.467419  | 2.205157  |
| H | -1.498054 | -0.755362 | 2.799670  |
| H | 2.046347  | -2.017763 | 1.655528  |
| H | 2.061857  | -1.278567 | 0.235361  |
| H | 2.101832  | -0.326991 | -2.042619 |

Ca(OH)<sub>2</sub>(H<sub>2</sub>O)<sub>4</sub>

|    |           |           |           |
|----|-----------|-----------|-----------|
| Ca | -0.001170 | 0.001950  | -0.000272 |
| O  | -1.406314 | -1.896283 | 0.650945  |
| O  | -1.878354 | 1.429183  | 0.669812  |
| O  | 1.895998  | 0.257864  | 1.242723  |
| O  | 1.874788  | -1.429700 | -0.668120 |
| O  | -1.898624 | -0.257143 | -1.241653 |
| O  | 1.410727  | 1.894558  | -0.652506 |
| H  | 2.277082  | -0.932501 | 0.103845  |
| H  | 2.502353  | -1.425320 | -1.395257 |
| H  | -1.896310 | -1.589411 | -0.164162 |
| H  | -1.253830 | -2.842434 | 0.586046  |
| H  | -2.505878 | 1.427588  | 1.396953  |
| H  | -2.281278 | 0.931527  | -0.101556 |
| H  | -2.277106 | -0.260985 | -2.121284 |
| H  | 1.265362  | 2.842074  | -0.591621 |
| H  | 1.898823  | 1.587146  | 0.163743  |
| H  | 2.273405  | 0.261596  | 2.122814  |

CaHCO<sub>3</sub>(H<sub>2</sub>O)<sub>5</sub><sup>+</sup>

|    |           |           |           |
|----|-----------|-----------|-----------|
| Ca | 0.302478  | -0.127784 | 0.057505  |
| O  | 0.026307  | -0.038438 | 2.433888  |
| O  | 2.721568  | 0.033251  | 0.193702  |
| O  | 0.740862  | -0.047459 | -2.322556 |
| O  | -0.412023 | 2.058875  | -0.608988 |
| O  | -0.229509 | -2.452108 | -0.092979 |
| O  | -1.875228 | -0.415036 | 0.416301  |
| O  | -4.135543 | -0.449620 | 0.411199  |
| O  | -2.987899 | 1.365900  | -0.304832 |
| C  | -3.058092 | 0.050853  | 0.219427  |
| H  | -1.179554 | -2.363078 | 0.103839  |
| H  | 0.000054  | -3.386487 | -0.094333 |
| H  | -1.399122 | 2.027740  | -0.541519 |
| H  | -0.142031 | 2.977880  | -0.513181 |
| H  | 0.745682  | -0.736455 | -2.997591 |
| H  | 0.401708  | 0.753858  | -2.742655 |
| H  | 3.268857  | 0.140685  | -0.594240 |
| H  | 3.331010  | -0.014002 | 0.940071  |
| H  | 0.374631  | 0.071720  | 3.324521  |
| H  | -0.926307 | -0.206516 | 2.506314  |

|   |           |          |           |
|---|-----------|----------|-----------|
| H | -3.894725 | 1.676656 | -0.432534 |
|---|-----------|----------|-----------|

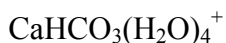

|    |           |           |           |
|----|-----------|-----------|-----------|
| Ca | 0.085895  | 0.216320  | 0.045724  |
| O  | 0.366528  | 0.623802  | 2.394294  |
| O  | 2.362181  | -0.583766 | 0.064837  |
| O  | 0.687030  | 1.426974  | -1.937567 |
| O  | -1.918309 | 1.546020  | 0.147288  |
| O  | -1.818069 | -1.114576 | -0.339370 |
| O  | -1.611789 | -3.330221 | -0.721300 |
| O  | 0.181502  | -2.069066 | -0.352707 |
| C  | -1.073282 | -2.139314 | -0.464380 |
| H  | 1.478853  | 1.268181  | -2.466037 |
| H  | 0.116294  | 1.997019  | -2.467100 |
| H  | -2.370745 | 2.387250  | 0.267915  |
| H  | -2.586971 | 0.863989  | -0.027015 |
| H  | 1.077788  | 0.263161  | 2.937875  |
| H  | -0.287710 | 0.983274  | 3.005673  |
| H  | 3.310624  | -0.448411 | 0.159003  |
| H  | 2.206127  | -1.526087 | -0.114303 |
| H  | -2.571872 | -3.226644 | -0.779021 |

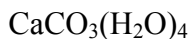

|    |           |           |           |
|----|-----------|-----------|-----------|
| Ca | -0.153228 | -0.361583 | 0.194359  |
| O  | 0.204808  | 0.540156  | 2.413118  |
| O  | 1.431536  | 0.009468  | -1.551442 |
| O  | -0.454248 | -2.692512 | 0.602768  |
| O  | -2.278850 | -1.151001 | -0.278204 |
| O  | -3.009293 | -1.075100 | -2.429862 |
| O  | -1.090243 | -0.045856 | -1.800965 |
| O  | -2.197028 | 0.833550  | 1.312497  |
| C  | -2.185141 | -0.768545 | -1.594690 |
| H  | 2.236941  | 0.122831  | -2.060244 |
| H  | 0.644368  | 0.018109  | -2.152418 |
| H  | -0.727515 | 0.809463  | 2.526750  |
| H  | 0.614521  | 0.452640  | 3.277689  |
| H  | -2.542503 | 0.069194  | 0.735821  |
| H  | -2.700310 | 1.617090  | 1.070806  |
| H  | -0.240645 | -3.623751 | 0.510080  |
| H  | -1.367161 | -2.513244 | 0.235907  |

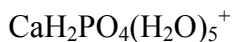

|    |           |           |           |
|----|-----------|-----------|-----------|
| Ca | 0.190813  | 0.136969  | -0.016955 |
| P  | 0.174354  | -3.218341 | -0.516120 |
| O  | -0.315835 | 0.590066  | 2.312375  |
| O  | 2.560600  | 0.118387  | 0.230510  |
| O  | -0.057239 | -0.269087 | -2.362126 |

|   |           |           |           |
|---|-----------|-----------|-----------|
| O | -0.317600 | 2.507512  | -0.087280 |
| O | 0.955304  | -1.978326 | -0.088810 |
| O | -1.219496 | -3.343252 | 0.038447  |
| O | 0.176217  | -3.065080 | -2.154425 |
| O | 1.029821  | -4.559679 | -0.297990 |
| O | -1.922274 | -0.894362 | 0.581467  |
| H | -1.080868 | 0.019017  | 2.480219  |
| H | 0.177591  | 0.665047  | 3.136930  |
| H | 0.067760  | -1.221850 | -2.555679 |
| H | -0.302604 | 0.160646  | -3.187286 |
| H | -1.803226 | -1.889558 | 0.439060  |
| H | -2.845834 | -0.697818 | 0.392030  |
| H | 2.696014  | -0.840596 | 0.140924  |
| H | 3.418940  | 0.550480  | 0.273101  |
| H | -0.289488 | 3.206775  | -0.750640 |
| H | -0.606034 | 2.921045  | 0.736205  |
| H | 0.627391  | -5.164809 | 0.337525  |
| H | -0.199073 | -3.817091 | -2.630527 |

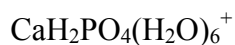

|    |           |           |           |
|----|-----------|-----------|-----------|
| Ca | -0.068126 | -0.217964 | 0.141225  |
| P  | 0.313021  | -0.307442 | 3.716616  |
| O  | 1.538684  | -2.233217 | 0.392554  |
| O  | -0.651954 | -2.138000 | -1.198675 |
| O  | 0.495374  | 2.008235  | 1.056731  |
| O  | -1.689760 | 1.061881  | -1.163396 |
| O  | -1.340030 | -0.174980 | 3.790000  |
| O  | 0.775176  | 1.286623  | 3.673547  |
| O  | 0.870296  | -1.004418 | 4.889137  |
| O  | 1.658616  | 0.813775  | -1.214051 |
| O  | -2.294739 | -0.332644 | 1.218055  |
| O  | 0.521322  | -0.740047 | 2.265774  |
| H  | -2.535743 | 1.157291  | -0.707630 |
| H  | -1.746495 | 1.546347  | -1.993804 |
| H  | 1.144771  | 1.588872  | 4.512775  |
| H  | -1.681119 | -0.237749 | 4.691321  |
| H  | 2.294972  | 0.595656  | -1.903092 |
| H  | 1.975032  | 1.607677  | -0.762641 |
| H  | 2.441406  | -2.518813 | 0.218090  |
| H  | 1.466720  | -2.067397 | 1.355179  |
| H  | -1.262675 | -2.490810 | -1.853189 |
| H  | -0.044557 | -2.843553 | -0.931218 |
| H  | 0.033854  | 2.844877  | 0.935801  |
| H  | 0.708073  | 1.943278  | 2.015044  |
| H  | -2.952201 | -1.026317 | 1.096127  |
| H  | -2.150708 | -0.268794 | 2.189032  |



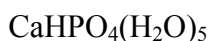

|    |           |           |           |
|----|-----------|-----------|-----------|
| Ca | 0.200258  | 0.214528  | -0.346793 |
| P  | 0.270001  | -3.065358 | -0.380746 |
| O  | -0.431675 | 0.663375  | 2.146915  |
| O  | 2.612013  | 0.171952  | 0.109980  |
| O  | 0.029640  | -0.379194 | -2.394917 |
| O  | -0.366994 | 2.525834  | 0.179882  |
| O  | 1.012772  | -1.863559 | 0.235165  |
| O  | -1.170386 | -3.181881 | 0.100359  |
| O  | 0.401266  | -2.972475 | -1.966746 |
| O  | 1.070884  | -4.423224 | -0.016996 |
| O  | -1.941026 | -0.805162 | 0.512016  |
| H  | -1.172090 | 0.046111  | 1.967738  |
| H  | 0.089473  | 0.281804  | 2.860960  |
| H  | 0.262120  | -2.015650 | -2.274615 |
| H  | -0.183666 | -0.174823 | -3.305513 |
| H  | -1.732375 | -1.815413 | 0.390338  |
| H  | -2.822568 | -0.666613 | 0.152536  |
| H  | 2.468802  | -0.800222 | 0.178152  |
| H  | 3.378572  | 0.312953  | -0.452493 |
| H  | -0.510171 | 3.424121  | -0.129165 |
| H  | -0.506151 | 2.495812  | 1.138541  |
| H  | 0.453941  | -5.126562 | 0.213297  |

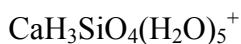

|    |           |           |           |
|----|-----------|-----------|-----------|
| Ca | 0.182900  | 0.108637  | 0.002971  |
| Si | 0.260229  | -3.286599 | -0.584828 |
| O  | -0.286270 | 0.752023  | 2.315766  |
| O  | 2.534955  | 0.024368  | 0.358788  |
| O  | -0.163233 | -0.312835 | -2.322725 |
| O  | -0.318270 | 2.491461  | -0.154123 |
| O  | 0.885580  | -1.978968 | 0.065185  |
| O  | -1.283245 | -3.417504 | 0.094634  |
| O  | 0.042405  | -3.028776 | -2.234842 |
| O  | 1.038328  | -4.731719 | -0.518458 |
| O  | -1.965783 | -0.864262 | 0.667093  |
| H  | -1.035513 | 0.205321  | 2.591223  |
| H  | 0.293977  | 0.842983  | 3.080413  |
| H  | -0.063746 | -1.276784 | -2.515119 |
| H  | -0.467007 | 0.110915  | -3.130813 |
| H  | -1.878458 | -1.845220 | 0.553634  |
| H  | -2.880514 | -0.644849 | 0.460744  |
| H  | 2.486563  | -0.952850 | 0.293922  |
| H  | 3.452098  | 0.308985  | 0.324341  |
| H  | -0.286217 | 3.172989  | -0.835076 |
| H  | -0.550682 | 2.935322  | 0.671042  |
| H  | 1.409682  | -5.070652 | 0.299074  |

|   |           |           |           |
|---|-----------|-----------|-----------|
| H | 0.291034  | -3.728722 | -2.845756 |
| H | -1.807888 | -4.203433 | -0.085968 |

CaH<sub>2</sub>SiO<sub>4</sub>(H<sub>2</sub>O)<sub>5</sub>

|    |           |           |           |
|----|-----------|-----------|-----------|
| Ca | 0.211027  | 0.128853  | -0.101128 |
| Si | 0.335214  | -3.208890 | -0.486052 |
| O  | -0.712275 | 1.007387  | 2.158274  |
| O  | 2.641991  | 0.118932  | 0.181007  |
| O  | -0.052031 | -0.330696 | -2.452320 |
| O  | -0.136685 | 2.542366  | 0.085568  |
| O  | 1.136240  | -1.897973 | -0.048389 |
| O  | -1.122762 | -3.345320 | 0.283128  |
| O  | 0.097960  | -3.011740 | -2.162398 |
| O  | 1.070592  | -4.690663 | -0.360236 |
| O  | -1.813702 | -0.590877 | 0.629611  |
| H  | -1.386136 | 0.329157  | 1.748042  |
| H  | -0.529710 | 0.769191  | 3.070828  |
| H  | 0.014659  | -1.316247 | -2.538530 |
| H  | -0.675727 | -0.031240 | -3.118909 |
| H  | -1.496913 | -2.472766 | 0.533369  |
| H  | -2.736812 | -0.537900 | 0.374237  |
| H  | 2.483581  | -0.859340 | 0.090687  |
| H  | 3.526638  | 0.330196  | -0.123399 |
| H  | 0.086426  | 3.452398  | -0.122029 |
| H  | -0.424159 | 2.486508  | 1.018372  |
| H  | 0.858511  | -5.190909 | 0.431172  |
| H  | -0.260697 | -3.764333 | -2.639954 |

CaNO<sub>3</sub>(H<sub>2</sub>O)<sub>4</sub><sup>+</sup>

|    |           |           |           |
|----|-----------|-----------|-----------|
| Ca | 0.250541  | -0.008681 | 0.094450  |
| O  | -0.258244 | 0.056475  | 2.431848  |
| O  | 2.667369  | -0.053957 | 0.021097  |
| O  | 0.597770  | 2.385969  | -0.114579 |
| O  | 0.520870  | -2.423801 | 0.097692  |
| O  | -0.467570 | -0.039505 | -2.111973 |
| O  | -1.982779 | 0.036498  | 0.475171  |
| O  | -4.153353 | 0.068698  | 0.363608  |
| O  | -2.991881 | 0.013780  | -1.468271 |
| N  | -3.096436 | 0.040302  | -0.215366 |
| H  | -1.231622 | 0.075897  | 2.388328  |
| H  | 0.009315  | 0.093133  | 3.355735  |
| H  | -1.471936 | -0.024105 | -2.019566 |
| H  | -0.244825 | -0.085992 | -3.046400 |
| H  | 0.308394  | -2.958268 | -0.678062 |
| H  | 0.365278  | -2.994649 | 0.860559  |
| H  | 3.256088  | 0.705289  | -0.068750 |
| H  | 3.230402  | -0.837477 | 0.035157  |

|   |          |          |           |
|---|----------|----------|-----------|
| H | 0.523707 | 3.046458 | 0.585405  |
| H | 0.340011 | 2.835343 | -0.929757 |

CaH(ox)(H<sub>2</sub>O)<sub>4</sub><sup>+</sup>

|    |           |           |           |
|----|-----------|-----------|-----------|
| Ca | 0.018447  | 0.058836  | 0.267766  |
| O  | 1.441349  | 1.406440  | 1.710807  |
| O  | 1.246377  | -1.238569 | 1.603292  |
| O  | 2.809508  | -1.442541 | 3.234348  |
| O  | 2.979813  | 1.281085  | 3.331482  |
| O  | -0.351871 | 2.419672  | -0.132581 |
| O  | -0.266503 | -2.307546 | -0.179016 |
| O  | -2.180089 | 0.009731  | 1.238704  |
| O  | 0.997589  | -0.122695 | -1.912730 |
| C  | 2.149240  | 0.743769  | 2.477211  |
| C  | 2.101232  | -0.829226 | 2.478754  |
| H  | -0.821823 | 3.047083  | -0.692918 |
| H  | 0.228983  | 2.928825  | 0.450338  |
| H  | 1.194673  | -1.010178 | -2.238431 |
| H  | 1.410103  | 0.496875  | -2.525562 |
| H  | -0.721077 | -3.081461 | -0.525780 |
| H  | 0.349299  | -2.589033 | 0.526628  |
| H  | -2.757468 | 0.736438  | 1.501103  |
| H  | -2.573464 | -0.794298 | 1.600569  |
| H  | 2.950839  | 2.250297  | 3.266801  |

CaH(ox)(H<sub>2</sub>O)<sub>5</sub><sup>+</sup>

|    |           |           |           |
|----|-----------|-----------|-----------|
| Ca | 0.310339  | -0.267907 | -0.477089 |
| O  | 0.653379  | -0.150391 | 1.981699  |
| O  | 0.613921  | -0.805243 | -2.814378 |
| O  | -1.551009 | -1.552854 | -1.420650 |
| O  | 2.560811  | 0.692658  | -0.679984 |
| O  | -0.428680 | 2.030144  | -0.635140 |
| O  | 1.314469  | -2.347093 | 0.225928  |
| O  | -1.662759 | 0.029078  | 0.774375  |
| O  | -3.834008 | -0.604955 | 1.022461  |
| O  | -3.687452 | -2.118612 | -1.142222 |
| C  | -2.604326 | -1.478182 | -0.796484 |
| C  | -2.740794 | -0.592917 | 0.483277  |
| H  | 1.373659  | -2.442137 | 1.185180  |
| H  | 1.359304  | -3.231729 | -0.154331 |
| H  | 1.182611  | 0.254276  | 2.676696  |
| H  | -0.286414 | -0.005738 | 2.196582  |

|   |           |           |           |
|---|-----------|-----------|-----------|
| H | 3.393674  | 0.209012  | -0.729513 |
| H | 2.793941  | 1.622113  | -0.572318 |
| H | -0.459944 | 2.838883  | -1.156608 |
| H | -1.207474 | 2.019028  | -0.056434 |
| H | 1.182129  | -0.627428 | -3.570758 |
| H | -0.155481 | -1.300584 | -3.130054 |
| H | -4.367056 | -1.879506 | -0.472881 |

Ca(ox)(H<sub>2</sub>O)<sub>4</sub>

|    |           |           |           |
|----|-----------|-----------|-----------|
| Ca | -0.036112 | -0.025682 | 0.188423  |
| O  | 1.215145  | 1.324631  | 1.411893  |
| O  | 1.236721  | -1.289621 | 1.479748  |
| O  | 3.007762  | -1.332825 | 2.871794  |
| O  | 2.607557  | 1.475666  | 3.176684  |
| O  | -0.758210 | 2.497477  | 0.401306  |
| O  | 0.244189  | -2.566114 | -0.437208 |
| O  | -2.274247 | 0.360685  | 0.998061  |
| O  | 0.771876  | -0.472534 | -2.039279 |
| C  | 2.017094  | 0.836941  | 2.338301  |
| C  | 2.147284  | -0.743621 | 2.261946  |
| H  | -0.782170 | 3.347022  | -0.048083 |
| H  | 0.070055  | 2.459690  | 0.961253  |
| H  | 0.863458  | -1.437880 | -1.945961 |
| H  | 1.466715  | -0.154800 | -2.623439 |
| H  | -0.178484 | -3.429520 | -0.427597 |
| H  | 0.809088  | -2.481689 | 0.384118  |
| H  | -2.217998 | 1.331126  | 1.061933  |
| H  | -2.845722 | 0.040471  | 1.702241  |

CaH(cit)(H<sub>2</sub>O)<sub>3</sub>

|    |           |           |           |
|----|-----------|-----------|-----------|
| Ca | 1.428607  | -0.535217 | -0.255144 |
| O  | -0.435069 | -0.446546 | 1.068751  |
| O  | -2.506803 | -0.367200 | 1.929379  |
| O  | 0.372738  | 1.043127  | -1.459559 |
| O  | 0.171117  | 2.744490  | -0.034624 |
| O  | -1.933768 | -3.054216 | -0.674772 |
| O  | 0.030466  | -2.239721 | -1.240012 |
| O  | -3.694010 | 0.111362  | -0.289082 |
| O  | 3.641709  | -0.121176 | -1.165943 |
| O  | 1.726099  | -1.587162 | 1.908106  |
| O  | 2.432606  | 1.595885  | 0.547415  |
| C  | -2.280295 | 0.166212  | -0.389722 |
| C  | -1.841757 | 1.625033  | -0.717396 |
| C  | -1.873943 | -0.793167 | -1.572706 |
| C  | -1.700569 | -0.255626 | 1.009384  |

|   |           |           |           |
|---|-----------|-----------|-----------|
| C | -1.178234 | -2.064103 | -1.160941 |
| C | -0.326153 | 1.845110  | -0.742259 |
| H | -2.283157 | 2.289873  | 0.024918  |
| H | -2.261424 | 1.885170  | -1.694782 |
| H | -1.202730 | -0.275063 | -2.251492 |
| H | -2.804075 | -1.033083 | -2.092595 |
| H | 3.677604  | 0.781409  | -0.800211 |
| H | 4.101821  | -0.120380 | -2.010183 |
| H | 0.793568  | -1.368605 | 2.127831  |
| H | 2.005973  | -2.337136 | 2.438552  |
| H | 2.666250  | 1.805639  | 1.457542  |
| H | 1.660550  | 2.210207  | 0.299472  |
| H | -3.860861 | 0.039391  | 0.671281  |
| H | -2.858612 | -2.773242 | -0.617244 |

Ca(cit)(H<sub>2</sub>O)<sub>3</sub><sup>-</sup>

|    |           |           |           |
|----|-----------|-----------|-----------|
| Ca | 1.540776  | -0.065020 | 0.419110  |
| O  | -0.441231 | 0.098112  | 1.397221  |
| O  | -2.628768 | 0.121667  | 1.897764  |
| O  | 0.736850  | 1.335589  | -1.221481 |
| O  | 0.103078  | 3.095263  | -0.009842 |
| O  | -1.316685 | -2.956566 | -0.154410 |
| O  | 0.610842  | -1.932518 | -0.656078 |
| O  | -3.464670 | 0.218240  | -0.521476 |
| O  | 2.707046  | -0.578393 | -1.746325 |
| O  | 1.889943  | -2.229899 | 1.609387  |
| O  | 2.144394  | 2.114679  | 1.360519  |
| C  | -2.044212 | 0.271823  | -0.420607 |
| C  | -1.624877 | 1.696970  | -0.922165 |
| C  | -1.446360 | -0.861076 | -1.336149 |
| C  | -1.684371 | 0.139464  | 1.103210  |
| C  | -0.700939 | -2.023120 | -0.653842 |
| C  | -0.164327 | 2.092469  | -0.710440 |
| H  | -2.257217 | 2.423013  | -0.411382 |
| H  | -1.854941 | 1.737708  | -1.992500 |
| H  | -0.779407 | -0.408129 | -2.069025 |
| H  | -2.307932 | -1.286828 | -1.851218 |
| H  | 2.278779  | 0.196114  | -2.143118 |
| H  | 2.013884  | -1.269442 | -1.788327 |
| H  | 1.284347  | -2.354015 | 2.348784  |
| H  | 1.374071  | -2.538102 | 0.815009  |
| H  | 1.898877  | 2.307332  | 2.271017  |
| H  | 1.489785  | 2.648273  | 0.808454  |
| H  | -3.749086 | 0.157660  | 0.411869  |

Ca(cit)(H<sub>2</sub>O)<sub>4</sub><sup>-</sup>

|    |          |          |          |
|----|----------|----------|----------|
| Ca | 0.369042 | 0.389735 | 0.077333 |
|----|----------|----------|----------|

|   |           |           |           |
|---|-----------|-----------|-----------|
| O | 0.027103  | 0.039369  | 2.547645  |
| O | 1.360567  | -0.266260 | -2.279434 |
| O | -0.091125 | 1.908611  | -1.570393 |
| O | -0.220130 | 3.875165  | -0.530628 |
| O | -3.790905 | 1.221989  | 1.343009  |
| O | -1.578641 | 1.303753  | 1.000939  |
| O | -1.248142 | -0.700174 | -3.027495 |
| O | -1.290401 | -0.970756 | -0.812018 |
| O | -4.443846 | 2.097527  | -0.980592 |
| O | 1.015466  | -2.081203 | -0.043441 |
| O | 1.570356  | 2.401127  | 0.801973  |
| C | -0.747549 | 2.919421  | -1.142342 |
| C | -2.254002 | 2.916422  | -1.386358 |
| C | -3.070900 | 1.687644  | -0.891608 |
| C | -2.797200 | 1.369331  | 0.620511  |
| C | -2.992742 | 0.412829  | -1.801309 |
| C | -1.743682 | -0.469121 | -1.908359 |
| H | -2.682634 | 3.795663  | -0.905456 |
| H | -2.425416 | 3.009306  | -2.464774 |
| H | -3.266900 | 0.735558  | -2.807130 |
| H | -3.792962 | -0.240183 | -1.436902 |
| H | 1.600623  | -2.055424 | -0.811140 |
| H | 0.112910  | -2.071831 | -0.444060 |
| H | 1.478070  | 2.651324  | 1.726511  |
| H | 1.047972  | 3.084807  | 0.282830  |
| H | -4.803287 | 1.846864  | -0.108361 |
| H | -0.822804 | 0.506988  | 2.328129  |
| H | -0.212746 | -0.826091 | 2.890800  |
| H | 1.332218  | 0.675401  | -2.506447 |
| H | 0.509126  | -0.588974 | -2.673475 |

CaH(mal)(H<sub>2</sub>O)<sub>4</sub><sup>+</sup>

|    |           |           |           |
|----|-----------|-----------|-----------|
| Ca | 2.348300  | 0.878364  | -1.985160 |
| O  | -0.513128 | 1.948141  | 0.973415  |
| O  | 0.840437  | 0.632204  | -0.128906 |
| O  | 3.158283  | 2.275983  | -0.148861 |
| O  | 1.860042  | -0.920017 | -3.414949 |
| O  | 4.453922  | -0.145728 | -1.383747 |

|   |           |           |           |
|---|-----------|-----------|-----------|
| O | 2.782379  | 2.563506  | -3.614931 |
| O | -0.659210 | -0.206765 | -3.673507 |
| O | 0.338287  | 1.588334  | -2.768213 |
| O | -3.000075 | 0.363098  | -2.494283 |
| C | -0.318065 | 0.967546  | 0.089766  |
| C | -1.514698 | 0.367232  | -0.595347 |
| C | -1.851870 | 0.991763  | -2.005467 |
| C | -0.641354 | 0.785416  | -2.923688 |
| H | -1.322899 | -0.696703 | -0.744008 |
| H | -2.414151 | 0.468327  | 0.015975  |
| H | 4.928842  | 0.176593  | -0.607724 |
| H | 4.941985  | -0.910932 | -1.709397 |
| H | 2.155193  | -1.770858 | -3.751816 |
| H | 0.920971  | -0.773256 | -3.730434 |
| H | 1.891639  | 2.727449  | -3.961728 |
| H | 3.414778  | 2.997305  | -4.196684 |
| H | 2.524043  | 2.204281  | 0.578790  |
| H | 3.572742  | 3.143545  | -0.078588 |
| H | -2.051330 | 2.060421  | -1.894299 |
| H | -2.705420 | -0.297494 | -3.141617 |
| H | -1.453140 | 2.129921  | 1.111724  |

Ca(mal)(H<sub>2</sub>O)<sub>4</sub>

|    |           |           |           |
|----|-----------|-----------|-----------|
| Ca | 2.505200  | 1.000984  | -2.103105 |
| O  | 0.355813  | 1.752599  | 0.614225  |
| O  | 1.178193  | 0.015451  | -0.525794 |
| O  | 2.649106  | 2.611387  | -0.343345 |
| O  | 2.074030  | -0.603399 | -3.848769 |
| O  | 3.760493  | -0.562126 | -0.715254 |
| O  | 2.744541  | 2.705352  | -3.838676 |
| O  | -0.552917 | -0.084544 | -3.743169 |
| O  | 0.459022  | 1.712036  | -2.871324 |
| O  | -2.814153 | 0.411442  | -2.362936 |
| C  | 0.199939  | 0.733112  | -0.083682 |
| C  | -1.190789 | 0.322456  | -0.547164 |
| C  | -1.614251 | 0.996636  | -1.891957 |
| C  | -0.499554 | 0.867125  | -2.938195 |
| H  | -1.214155 | -0.757914 | -0.699633 |
| H  | -1.933364 | 0.598652  | 0.202200  |
| H  | 4.506826  | -0.554460 | -0.109523 |
| H  | 2.942929  | -0.630935 | -0.178939 |
| H  | 2.256720  | -1.547074 | -3.879410 |
| H  | 1.093252  | -0.494950 | -4.007526 |
| H  | 1.774581  | 2.653780  | -3.953799 |
| H  | 3.135509  | 2.818400  | -4.709537 |
| H  | 1.833276  | 2.366352  | 0.197417  |
| H  | 2.686820  | 3.571635  | -0.372344 |

|   |           |           |           |
|---|-----------|-----------|-----------|
| H | -1.799127 | 2.057694  | -1.714647 |
| H | -2.544435 | -0.249014 | -3.018794 |
